1 **Macrocyclic colibactin induces DNA double-strand breaks via copper-mediated**  
2 **oxidative cleavage**

3

4

5 **Authors:** Zhong-Rui Li<sup>1,2</sup>, Jie Li<sup>4</sup>, Wenlong Cai<sup>2</sup>, Jennifer Y. H. Lai<sup>1</sup>, Shaun M. K.  
6 McKinnie<sup>4</sup>, Wei-Peng Zhang<sup>1</sup>, Bradley S. Moore<sup>4,5</sup>, Wenjun Zhang<sup>2,3\*</sup> & Pei-Yuan  
7 Qian<sup>1\*</sup>

8

9

10 **Affiliations:**

11 <sup>1</sup>Department of Ocean Science and Division of Life Science, The Hong Kong  
12 University of Science and Technology, Clear Water Bay, Kowloon, Hong Kong,  
13 China.

14 <sup>2</sup>Department of Chemical and Biomolecular Engineering, University of California,  
15 Berkeley, California 94720, USA.

16 <sup>3</sup>Chan Zuckerberg Biohub, San Francisco, California 94158, USA.

17 <sup>4</sup>Center for Marine Biotechnology and Biomedicine, Scripps Institution of  
18 Oceanography, University of California, San Diego, La Jolla, California 92093, USA.

19 <sup>5</sup>Skaggs School of Pharmacy and Pharmaceutical Sciences, University of California,  
20 San Diego, La Jolla, California 92093, USA.

21

22 \*e-mail: boqianpy@ust.hk; wjzhang@berkeley.edu

23

24 **Abstract**

25 Colibactin is an as-yet-uncharacterized human gut bacterial genotoxin, whose  
26 biosynthesis is linked to *clb* genomic island that distributes widespread in pathogenic  
27 and commensal human enterobacteria. Colibactin-producing gut microbes promote  
28 colon tumor formation and enhance progression of colorectal cancer (CRC) via DNA  
29 double-strand breaks (DSBs)-induced cellular senescence and death; however, the  
30 chemical basis contributing to the pathogenesis at the molecular level remains elusive.  
31 Here we report the discovery and the mechanism of action of colibactin-645 as the  
32 highly sought final colibactin metabolite with a novel molecular scaffold.  
33 Colibactin-645 recapitulates its previously assumed genotoxicity and cytotoxicity,  
34 exhibiting a strong DNA DSBs activity *in vitro* and in human cell cultures via a  
35 unique copper-mediated oxidative mechanism. We also present a complete model for  
36 colibactin biosynthesis, revealing an unprecedented dual function of the  
37 aminomalonate-utilizing polyketide synthases. This work thus provides the first  
38 molecular basis for colibactin's genotoxic activity and facilitates further mechanistic  
39 study of colibactin-related CRC incidence and prevention.

40

41

## 42 Main Text

43 Human microbiota is a massive consortium of all microbes that reside in and on  
44 human bodies. These microbes are increasingly being correlated to human health and  
45 disease, but the underlying molecular mechanisms of human-microbe interactions  
46 often remain elusive<sup>1,2</sup>. Interrogating the specialized metabolites produced by human  
47 microbiota allows a thorough study of chemical regulatory and signaling processes,  
48 and improves our understanding of the interplay between microbiota and host at a  
49 molecular level. Despite the importance of these small molecules in human health and  
50 disease, it is often challenging to characterize them because of the difficulty in the  
51 culture and genetics of producing microbes and the low titers of these metabolites<sup>3-5</sup>.

52 A well-known example of such specialized metabolite is colibactin, a cryptic  
53 human gut bacterial genotoxin that has captured the attention of both biologists and  
54 chemists due to its significant effects on human health and intriguing biosynthetic  
55 logic<sup>6-8</sup>. The biosynthesis of colibactin is linked to a 54-kilobase nonribosomal  
56 peptide synthetase (NRPS)-polyketide synthase (PKS) hybrid gene cluster<sup>9</sup> (*clb*  
57 pathogenicity island), which has been phenotypically associated with the pathogenesis  
58 of colorectal cancer (CRC). In particular, *in vitro* infection with *Escherichia coli*  
59 strains harboring *clb* induced DNA double-strand breaks (DSBs) in cultivated human  
60 cells, leading to cell cycle arrest and eventually cell death<sup>9</sup>. Subsequent physiological  
61 studies showed that *clb*<sup>+</sup> bacteria induced *in vivo* DNA damage and genomic  
62 instability in enterocytes<sup>10</sup>, caused cellular senescence<sup>11,12</sup>, increased intestinal  
63 permeability<sup>13</sup>, and promoted colon tumor formation in mouse models of chronic  
64 intestinal inflammation<sup>12,14,15</sup>, suggesting that these bacteria could promote human  
65 CRC development on a broader level<sup>8</sup>. Consistently, *clb*<sup>+</sup> *E. coli* was over-represented  
66 in biopsies isolated from CRC patients compared to non-CRC controls (~60% vs.  
67 ~20%, respectively)<sup>14,16</sup>. In addition to its remarkable association with human health,  
68 the *clb* island was also identified in the genomes of other proteobacteria, including  
69 coral and honeybee symbionts, suggesting an even more comprehensive role that  
70 colibactin might play in mediating evolutionarily conserved or consistent interactions  
71 between bacteria and hosts<sup>17,18</sup>.

72 Given the physiological importance of intestinal pathology induced by human  
73 body's microscopic residents, it is urgent to reveal the molecular identity of genotoxic  
74 colibactin as the missing link between certain gut microbes and DNA DSBs and  
75 decode the mechanism underlying colibactin-induced DNA damage. Despite  
76 tremendous efforts, colibactin's structural elucidation remains a formidable challenge  
77 due to its instability, low titer, and the elusive and complex biosynthetic logic of *clb*  
78 pathway<sup>19-29</sup>. This knowledge gap has prevented comprehensive studies of  
79 colibactin-related CRC incidence and prevention, and limited mechanistic  
80 investigations of even more extensive influence of *clb* island on microbe-host  
81 interactions.

82 In order to investigate the corresponding genotoxic colibactin that possesses  
83 intrinsic DNA DSBs activity and causes chromosome aberrations, the following three

84 issues need to be addressed. 1) The mutation of individual *clb* genes revealed that all  
85 genes encoding NRPS-PKS and associated biosynthetic enzymes were indispensable  
86 to the genotoxicity of *clb* island<sup>9,26</sup>, however, the final colibactin metabolite that  
87 requires all of the *clb* genes for its biogenesis has not been identified. 2) The precise  
88 role of ClbP, a membrane-bound peptidase that was proposed to be important for  
89 colibactin maturation<sup>19,20</sup>, remains unknown. 3) The induction of DNA DSBs has been  
90 defined as a signature feature of *clb* island<sup>6-10</sup>, yet the conclusive evidence for  
91 colibactin directly mediating DNA breakage is still lacking, despite that  
92 precolibactin-546 (**5**) showed a weak DNA crosslinking activity *in vitro* in the  
93 presence of reducing agents<sup>24</sup> (Fig. 1a). Of the many types of DNA damage that exist  
94 within cells, the DNA DSBs are considered to be the most hazardous lesions<sup>30</sup>,  
95 suggesting the remarkable cytotoxicity of the yet-to-be-identified colibactin  
96 metabolite. Here we report the structural elucidation of the final mature colibactin,  
97 and further show that colibactin induces DNA DSBs *in vitro* and in various human  
98 cell cultures via a unique copper-mediated oxidative mechanism.

99

## 100 Results

### 101 Discovery of complete colibactin precursor

102 Our previous efforts to identify colibactin biosynthetic intermediates resulted in  
103 the structural elucidation of precolibactin-886 (**10**)<sup>28</sup>, which was isolated from a *clb*<sup>+</sup>  
104 heterologous expression strain *E. coli* DH10B/pCAP01-*clb* with disrupted *clbP* and  
105 *clbQ* that encode a peptidase and a type II thioesterase mediating the off-loading of  
106 *clb* pathway intermediates, respectively<sup>19,28,31</sup> (Fig. 1). The double mutation of  
107  $\Delta clbP\Delta clbQ$  increased the titer of downstream metabolites from the NRPS-PKS  
108 assembly line, enabling the structural characterization of **10** whose biogenesis  
109 requires all components of the assembly line except the PKS ClbO<sup>28</sup>. We then  
110 searched for a more complete colibactin derivative that could account for the activity  
111 of ClbO. The initial examination of the  $\Delta clbP\Delta clbQ$  and  $\Delta clbP\Delta clbQ\Delta clbO$  mutants  
112 for the selective loss of metabolites identified a precolibactin metabolite with *m/z* 970  
113 (named precolibactin-969, **11**) in a trace amount (Fig. 1, Fig. 2a). To facilitate the  
114 structural elucidation of **11**, additional regulatory/resistance *clb* genes including *clbR*  
115 and *clbS* were explored to probe their effects on the production of **11**. ClbR is a  
116 known positive transcriptional regulator and its overexpression previously led to a  
117 five-fold increase in the prodrug motif accumulation<sup>22</sup>, and ClbS is a colibactin  
118 resistance protein that was proposed to sequester or modify colibactin and thereby  
119 prevent self-inflicted DNA damage<sup>32,33</sup>. While overexpression of *clbR* had no obvious  
120 effect on the titer of **11**, inactivation of *clbS* resulted in a notable four-fold increase in  
121 the titer of **11** along with other precolibactins (Fig. 2a). The observed eliciting  
122 phenomenon in  $\Delta clbS$  is consistent with the proposed function of ClbS, and we thus  
123 used the  $\Delta clbP\Delta clbQ\Delta clbS$  mutant strain for the subsequent precolibactin production  
124 and purification.

125 From a 2,000-L fermentation culture of  $\Delta clbP\Delta clbQ\Delta clbS$ , 50  $\mu\text{g}$  of **11** was  
126 obtained after extraction with organic solvent followed by multiple rounds of  
127 reversed-phase liquid chromatography purification. **11** was isolated as white and  
128 amorphous powder, and its molecular formula was determined as  $\text{C}_{44}\text{H}_{59}\text{N}_9\text{O}_{12}\text{S}_2$  by  
129 high-resolution mass spectrometry (HRMS) ( $m/z$  970.3799, calculated: 970.3797),  
130 which has an additional  $\text{C}_3\text{HNO}_2$  compared to the formula of **10**. The presence of an  
131 extra nitrogen atom in **11** is consistent with the known aminomalonate substrate  
132 utilization by ClbO<sup>26,27</sup>, which was also supported by the isotope-labeled precursor  
133 feeding experiments, suggesting the incorporation of an additional aminomalonate  
134 compared to **10**. Similar to **10**, **11** was isolated as an approximately equal mixture of  
135 two isomers. Analysis of extensive nuclear magnetic resonance (NMR) spectra and  
136 high-resolution tandem mass spectrometry (HRMS<sup>n</sup>) fragmentation data demonstrated  
137 that **11** and **10** share the same macrocyclic scaffold from C-1 to C-40 (Fig. 1),  
138 indicating that ClbO functions towards the end of the NRPS-PKS assembly line to  
139 incorporate the last building monomer of aminomalonate. However, we were not able  
140 to assign the structure of this extra region (C-41 to C-44) based on the NMR spectra  
141 due to the apparent proton deficiency feature and the extremely low titer of **11** at this  
142 stage.

143 We then turned to the PKS activity of ClbO to predict the fate of the  
144 corresponding aminomalonate unit. In the *clb* locus, two PKS modules, ClbK<sub>PKS</sub> and  
145 ClbO, were enzymatically established to incorporate an aminomalonate extender  
146 unit<sup>26,27</sup>. Both PKS modules have domains organized into KS-AT\*-ACP (Fig. 1b). A  
147 maximum likelihood tree revealed a close phylogenetic relationship between these  
148 two KS domains, suggesting a similar activity of ClbK<sub>PKS</sub> and ClbO. While ClbK<sub>PKS</sub>  
149 was shown to incorporate aminomalonate through a decarboxylative Claisen  
150 condensation in forming **10** (Fig. 2b), this reactivity does not account for the addition  
151 of three carbon atoms promoted by ClbO in forming **11**. Considering the typical  
152 observation that the titers of upstream colibactin metabolites were significantly higher  
153 than those of downstream metabolites<sup>25,28</sup>, we searched for a possible intermediate  
154 that is stalled at ClbK<sub>PKS</sub> with an additional of  $\text{C}_3\text{HNO}_2$  in its molecular formula  
155 compared to precolibactin-712 (**7**) to facilitate the total structural determination of **11**  
156 (Fig. 1). Careful analysis of the culture extracts of  $\Delta clbP\Delta clbQ\Delta clbS\Delta clbO$  revealed  
157 a new metabolite (named precolibactin-795a, **8**) with the molecular formula of  
158  $\text{C}_{39}\text{H}_{53}\text{N}_7\text{O}_9\text{S}_1$  ( $m/z$  796.3697, calculated 796.3698) (Fig. 2c). A total of 1.1 mg of **8**  
159 from a 500-L fermentation culture were obtained and extensive analysis of the NMR  
160 spectra and HRMS<sup>n</sup> fragmentation data indicated that in comparison with **7** and  
161 precolibactin-795b (**9**), **8** contains a unique 5-hydroxy oxazole moiety next to the  
162 terminal carboxyl group (Fig. 1). We propose that to assemble **8**, the aminomalonate  
163 unit is incorporated into the assembly line by ClbK<sub>PKS</sub> through nucleophilic attack of  
164 the amine in the aminomalonate extender unit on the upstream peptidyl-S-T thioester  
165 of ClbJ, followed by synchronous cyclization and release (Fig. 1, Fig. 2d). This novel  
166 biosynthetic logic of accommodating a rare aminomalonate building block by PKS  
167 was further supported by the gene inactivation and isotope labeled precursor feeding

168 experiments (Fig. 2c). We thus deduce that **11** contains the same 5-hydroxy oxazole  
169 moiety next to its terminal carboxyl group, which is derived from the aminomalonate  
170 extender unit of ClbO and formed through the same chemical logic as in **8** (Fig. 1, Fig.  
171 2e). The discovery of **8** suggests the dual function of aminomalonate-utilizing PKSs  
172 in promoting both the C–C and C–N bond formations in colibactin biosynthesis.  
173 Indeed, a precolibactin metabolite (precolibactin-943, **12**) with  $m/z$  944 corresponding  
174 to the decarboxylative condensation activity of ClbO was also observed, but its titer  
175 was only approximately 10% of that of **11**.

176

### 177 **Maturation of colibactin**

178 Precolibactin-969 (**11**) is hitherto the largest colibactin derivative that requires all  
179 components of the NRPS-PKS assembly line for its biosynthesis. We next examined  
180 whether ClbP, the dedicated peptidase for colibactin maturation, is capable of  
181 hydrolyzing this precursor in the bacterial periplasm and releasing the mature  
182 colibactin (Fig. 3a). Incubation of **11** with the culture of *E. coli* expressing ClbP  
183 resulted in the complete loss of **11** and the production of both the prodrug motif  
184 *N*-myristoyl-D-asparagine (**14**) and a new metabolite (named colibactin-645, **13**) with  
185 the molecular formula of  $C_{26}H_{27}N_7O_9S_2$  ( $m/z$  646.1394, calculated 646.1384) (Fig. 3).  
186 **13** was confirmed to be the mature compound of **11** with a free *N*-terminus after  
187 cleavage and release of the prodrug motif based on the comparative HR-MS/MS  
188 analysis. It is notable that different from **11** and **14**, **13** is a very water-soluble  
189 compound which could not be extracted by typical organic solvents such as ethyl  
190 acetate<sup>21,24</sup>. Additionally, we observed a significantly increased recovery yield of **13**  
191 from the ClbP-expressing *E. coli* culture upon treatment of metal chelators, such as  
192 ethylenediaminetetraacetic acid (EDTA) and Chelex-100 (Fig. 3b). The positive effect  
193 of metal chelators on metabolite yields from *E. coli* cultures was also observed for **11**,  
194 but not for other precolibactins such as **2**, **5**, and **7**. These results suggested the  
195 susceptibility of colibactin-645 (**13**) and its precursor (**11**) to trace metals for possible  
196 degradation.

197

### 198 **Colibactin production by a native strain**

199 We next investigated whether the native *clb*<sup>+</sup> *E. coli* strain could produce the  
200 same colibactin-645 to probe if **13** was a native metabolite or an artifact arising from  
201 a non-natural biosynthetic pathway in a heterologous host. LC–MS analysis of  
202 cell-free culture extracts of the wild-type *clb*<sup>+</sup> *E. coli* CFT073 and its *clb*<sup>-</sup> mutant  
203 revealed a peak identical to **13** only in the wild-type *clb*<sup>+</sup> strain, confirming that **13** is  
204 the native product of the *clb* pathogenicity island (Fig. 3b). It is notable that after  
205 enrichment from a 2-L of fermentation culture, only a trace amount of **13** was  
206 detected by HRMS analysis, indicating the low titer of **13** or its chemical lability.  
207 Since previous work showed that direct contact between bacterial and eukaryotic cells



208 was required for full toxicity of colibactin<sup>9</sup>, we further examined whether a majority  
209 of **13** are associated with the producing cells. **13** was not detected in the cellular  
210 extract of *clb*<sup>+</sup> *E. coli* CFT073 (Fig. 3b), suggesting that the mature colibactin was  
211 secreted after production and highly unstable after secretion.

212

### 213 **DSBs activity of colibactin *in vitro***

214 After obtaining the highly sought mature colibactin (**13**), we examined its DNA  
215 DSBs *in vitro* using the pBR322 plasmid DNA strand scission assay, a surrogate test  
216 for DNA damage<sup>34</sup>. Although **13** showed sparse DNA damage activity upon  
217 incubation with DNA, in the presence of Cu(II), but not other metals such as Fe(III)  
218 and Fe(II), both **13** and its precursor precolibactin-969 (**11**) caused significant DNA  
219 breakage with the formation of both nicked (Form II) and linearized (Form III) DNA  
220 from the supercoiled plasmid DNA (Form I) (Fig. 4a). Since **13** and **11** demonstrated  
221 comparable DNA damage activities in initial tests, we used **11** as an appropriate  
222 substitute for **13** in the following *in vitro* assays because **11** was more readily  
223 available. A time-course experiment of DNA cleavage was then performed to  
224 determine if the colibactin-induced linearized DNA arose from coupled  
225 strand-cleavage events (DSBs), or from an accumulation of unrelated single-strand  
226 breaks (SSBs). All three forms of DNA were visible on the gel, showing classical  
227 evidence of DSBs (Fig. 4b). A Freifelder–Trumbo analysis was further performed to  
228 calculate the number of SSBs ( $n_1$ ) and DSBs ( $n_2$ ) per molecule of DNA after treatment  
229 with **11** at various time points, which resulted in a constant ratio of SSBs to DSBs  
230 (5.35:1). This number is significantly lower than 120:1 that was expected if DSBs  
231 were to arise from an accumulation of unrelated SSBs<sup>35</sup>, and is comparable to some of  
232 the well-known DNA DSBs inducers including (–)-lomaiviticin A (5.3:1) and  
233 bleomycin (9:1)<sup>34,36</sup>, supporting the coupled strand-cleavage activity of colibactin. It  
234 is notable that under the same reaction condition, **11** displayed a stronger DNA DSBs  
235 activity than bleomycin which also requires the presence of a redox-active metal ion  
236 for DNA cleavage<sup>37,38</sup>.

237 The observed Cu(II)-mediated DSBs activity of colibactin is reminiscent of the  
238 oxidative mechanism of DNA cleavage involving a metal center reduction<sup>35,39</sup>. The  
239 addition of neocuproine, a specific Cu(I) chelator, completely sequestered the DSBs  
240 activity of **11**, suggesting that Cu(I) is an essential component for **11**-induced DNA  
241 cleavage (Fig. 4c). Surprisingly, the presence of a reducing agent, such as  
242  $\beta$ -mercaptoethanol ( $\beta$ -ME) or dithiothreitol (DTT), had no obvious effect on the  
243 DSBs activity of **11** (Fig. 4c). We thus propose that the reduction of Cu(II) to Cu(I)  
244 may be mediated by the DNA or by **11** itself, and the latter was supported by the free  
245 Cu(I) determination assays upon incubation of **11** and Cu(II). In addition, **10**  
246 demonstrated a comparable copper reduction activity as **11**, suggesting that the same  
247 macrocyclic scaffold in both compounds could be the active center for Cu(II) binding  
248 and reduction. The parallel monitor of the mixture of **10** and Cu(II) by HRMS further

249 showed a loss of the mass signal for **10** over time which was accompanied by an  
250 approximately stoichiometric formation of Cu(I), and also a presence of a new mass  
251 signal with an isotopic pattern of copper-bound complex<sup>40</sup>. Although this new mass  
252 signal was weak and transient which prevented its further characterization, this data  
253 supported the direct binding of **10** to copper and the instability of **10** in the presence  
254 of copper.

255 The oxidative mechanism of DNA cleavage was further probed by adding  
256 various reactive oxygen species (ROS) scavengers. Plasmid DNA damage by **11** was  
257 not measurably influenced by the hydroxyl radical scavengers mannitol and dimethyl  
258 sulfoxide (DMSO) (Fig. 4d), which argues against participation of the freely  
259 diffusible hydroxyl radical in the observed cleavage and distinguishes the mechanism  
260 by which colibactin incises DNA from a sole Fenton-like one<sup>41</sup>. The addition of  
261 superoxide dismutase (SOD), which catalyzes the conversion of the superoxide  
262 radical into hydrogen peroxide (H<sub>2</sub>O<sub>2</sub>), did not measurably influence DNA cleavage  
263 by **11** (Fig. 4d). In contrast, potassium iodide (KI), a H<sub>2</sub>O<sub>2</sub> scavenger, and catalase,  
264 which mediates the decomposition of H<sub>2</sub>O<sub>2</sub>, significantly inhibited the cleavage  
265 reaction (Fig. 4d). These results suggested that H<sub>2</sub>O<sub>2</sub> was involved in mediating DNA  
266 cleavage *in vitro*, consistent with the observation of a significant increase in  
267 H<sub>2</sub>-DCFDA fluorescence (a sensor of hydroxyl and peroxy radicals, and hydrogen  
268 peroxide production) in non-transformed human lung fibroblast cells infected by  
269 colibactin-producing *E. coli*<sup>11</sup>.

270 The DNA DSBs activity of **11** was next compared to other precolibactins for a  
271 preliminary structure–activity relationship study. Under the same reaction condition,  
272 **10** displayed a significantly weaker DSBs activity than **11**, demonstrating that the  
273 extra 5-hydroxy oxazole moiety in **11** was important for augmenting the DSBs  
274 activity. The DSBs activity of **5**, a precolibactin that has previously demonstrated  
275 DNA-crosslinking activity due to its aza-spirocyclopropane warhead, was also  
276 tested<sup>24</sup>. **5** did not display DNA-damaging activity even at concentrations as high as 5  
277 mM.

278

### 279 **DSBs activity of colibactin in cells**

280 We next examined the DNA damaging activity of colibactin in various human  
281 cell lines. Production of phosphorylated histone H2AX ( $\gamma$ H2AX) and translocation of  
282 the p53 binding protein 1 (53BP1) are early events in the cellular response to DNA  
283 DSBs<sup>42,43</sup>. Four hours after exposure to 50 nM of **13**, HeLa cells showed formation  
284 and colocalization of foci derived from  $\gamma$ H2AX and 53BP1 (Fig. 5a). By comparison,  
285 the  $\gamma$ H2AX and 53BP1 foci were undetectable in cells treated with 50 nM of **11** (Fig.  
286 5a), in contrast to the comparable activity of **13** and **11** in the pBR322 plasmid DNA  
287 strand scission assay. This result supported that maturation was a prerequisite for  
288 colibactin's genotoxicity *in vivo*<sup>15</sup>. In addition, **15**, the mature product of **10** after ClbP

289 cleavage, also demonstrated a significantly lower activity than that of **13** (Fig. 5a),  
290 consistent with the lower DSBs activity of **10** than **11** *in vitro*. The similar foci  
291 formation and colocalization were also observed in other cell lines such as human  
292 normal colon epithelial FHC cells, human normal colon fibroblast CCD-112 CoN  
293 cells, and colorectal cancer HCT-116 cells treated with 50 nM of **13**, which  
294 established that the cellular response to **13** was not cell-line specific, consistent with  
295 previously reported cytopathic effect in various cell lines that were infected by *clb*<sup>+</sup> *E.*  
296 *coli* strains<sup>9</sup>.

297 A neutral comet unwinding assay was also conducted as an effective and  
298 independent method to evaluate the occurrence of DNA DSBs in cells treated with  
299 **13**<sup>44</sup>. Consistent with the results of  $\gamma$ H2AX and 53BP1 induction, a four-hour  
300 exposure of HeLa cells to **13** caused accrued DNA lesions in a  
301 concentration-dependent manner, demonstrated by the migration of cleaved DNA  
302 fragments (comet tail) from the nucleoid (comet head) under the influence of an  
303 electric field (Fig. 5b). Furthermore, the treatment of either EDTA or  
304 bathocuproinedisulfonic acid (BCS), an extracellular Cu-sequestering agent,  
305 significantly alleviated the levels of DNA damage caused by the purified compound  
306 **13** or the infection of *clb*<sup>+</sup> *E. coli* CFT073 (Fig. 5c, d), which is in agreement with the  
307 observed dependence of copper for colibactin-induced DNA DSBs *in vitro*.

308

## 309 Discussion

310 Despite extensive studies on the biology of the *clb* pathogenicity island and the  
311 chemistry of the *clb* encoding enzymes, the genotoxic colibactin metabolite with  
312 intrinsic DNA DSBs activity had escaped all screening surveillance in the past decade.  
313 For the first time, through strain engineering, large-scale fermentation and metabolite  
314 comparison, we have identified and characterized the highly sought genotoxic  
315 colibactin metabolite, colibactin-645 (**13**). The biosynthesis of **13** requires all  
316 predicted biosynthetic enzymes encoded on the *clb* pathogenicity island; more  
317 importantly, **13** recapitulates its pre-assumed DNA DSBs activity both *in vitro* and in  
318 cell cultures, distinguishing **13** from all previously identified metabolites associated  
319 with this pathogenicity island. Considering that all predicted biosynthetic genes were  
320 indispensable to the genotoxicity of *clb* island<sup>9,26</sup>, **13** is predicted to be the final  
321 mature colibactin metabolite of biological relevance. Interestingly, although  
322 macrocyclic colibactins, including **10**, **11**, **13**, and **15**, required copper for their  
323 bioactivity, they quickly degraded in the presence of copper, which prevented direct  
324 characterization of any colibactin·Cu complex. This is akin to the instability of the  
325 activated bleomycin that was suggested to have a half-life of only several minutes at  
326 4 °C after binding to a reduced transition metal<sup>45</sup>. In addition to the low abundance  
327 and chemical lability, the macrocyclic mature colibactin appeared to be polar  
328 compound that stayed in the aqueous phase during organic solvent extraction, which  
329 could further contribute to the difficulty in the genotoxic metabolite detection.



330 The biosynthesis of **13** features a new fate for the atypical aminomalonyl  
331 extender unit utilized by PKSs. The incorporation of this aminomalonyl extender unit  
332 has been previously elucidated through a traditional decarboxylative Claisen  
333 condensation in zwittermicin, guadinomine and colibactin biosynthesis<sup>28,46,47</sup>. In  
334 particular, ClbK<sub>PKS</sub> has been shown to promote the decarboxylative condensation of  
335 the aminomalonyl unit that contributes for thiazole and 2,5-dihydro-5-hydroxyoxazole  
336 formation in **10** biosynthesis<sup>28</sup>. By comparison, ClbO, the tri-domain PKS that is  
337 highly homologous to ClbK<sub>PKS</sub>, has been demonstrated here to preferentially catalyze  
338 the non-decarboxylative condensation via amide bond formation that enables the  
339 terminal 5-hydroxy oxazole acid generation in **11** and **13** biosynthesis. Furthermore,  
340 identification of minor precolibactin metabolites, such as **8** and **12**, indicates that both  
341 ClbK<sub>PKS</sub> and ClbO are capable of facilitating both the C–C and C–N bond formation,  
342 demonstrating for the first time the dual function of aminomalonate-utilizing PKSs. It  
343 is yet to be determined the molecular basis for these PKSs to prefer one mechanism  
344 over the other in producing **13** as the major genotoxic metabolite.

345 Based on the DNA damage assays both *in vitro* and in cells, we propose the  
346 following mechanism for copper-mediated DNA DSBs by colibactin-645 (**13**). After  
347 being secreted from a producing bacterium that localizes close to or in contact with  
348 the intestinal brush border<sup>10</sup>, **13** binds to exchangeable copper in the intestinal lumen,  
349 likely coming from diet<sup>48</sup>, to form a colibactin·Cu(II) complex. This complex is  
350 quickly transported into the epithelial cell while reduced to a colibactin·Cu(I)  
351 complex, and the coordination of O<sub>2</sub> to this cuprous complex in cells generates  
352 ‘activated colibactin’ that attacks DNA and initiates DNA cleavage. Cu(II)—O· (or  
353 Cu(III)=O) is proposed to be the active species in the ‘activated colibactin’ complex  
354 susceptible of DNA carbon–hydrogen bond activation<sup>39</sup>, which is consistent with the  
355 observed inhibitory effects of H<sub>2</sub>O<sub>2</sub> scavengers on the DNA cleavage reaction *in vitro*  
356 as colibactin·Cu(II)—OOH is a key intermediate to colibactin·Cu(II)—O·. Additionally,  
357 we do not exclude the possibility that **13** quickly enters the epithelial cell and then  
358 binds the intracellular copper to exert its activity. This mechanism is analogous to the  
359 proposed one for the generation of ‘activated bleomycin’ *in vivo*, differing mainly in  
360 the metal usage and the intrinsic metal reduction activity of compounds<sup>37,38</sup>.

361 The unusual heterocycle-fused macrocycle in **13** is important for copper binding  
362 and reduction, as only macrocyclic colibactins, such as **10** and **11**, demonstrated a  
363 strong and comparable Cu(II) reduction activity. In addition, the comparison between  
364 the DSBs activity of **10** and **11**, as well as **15** and **13**, highlights the significance of the  
365 terminal 5-hydroxy oxazole moiety for DNA DSBs activity. We speculate that the  
366 thiazole/5-hydroxy oxazole tail found in **11** and **13** may serve as the DNA  
367 intercalating element, similar to the function of the bithiazole moiety found in  
368 bleomycin<sup>37,38</sup>. Based on the comparative DSBs activity of **11** and **13** *in vitro* but a  
369 drastically different solubility as well as a significantly lower activity of **11** in cellular  
370 assays, we further propose that the loss of the *N*-terminal fatty acyl-asparagine residue  
371 as the prodrug motif facilitates the access of mature colibactin-645 to target

372 eukaryotic cells<sup>15</sup>. Although many secondary metabolites have been reported to  
373 induce DNA DSBs, a majority of them function via indirect mechanisms (such as by  
374 inhibiting topoisomerase complexes<sup>49</sup>), and few of them cleave DNA double-strand  
375 directly<sup>50</sup>. **13** thus represents a novel molecular scaffold exerting a direct DNA DSBs  
376 activity, providing a model for designing and synthesizing potent DNA cleaving  
377 agents, from synthetic restriction ‘enzymes’ to chemotherapeutic agents.

378 In summary, we have identified and characterized the highly sought mature  
379 genotoxic colibactin metabolite, provided the conclusive evidence for macrocyclic  
380 colibactin directly mediating DNA damage, and shed light on the long-standing  
381 mystery of the molecular mechanism underlying colibactin-induced DNA DSBs. Our  
382 discoveries thus lay out a framework for future investigations that could enhance our  
383 understanding of the *clb* pathogenicity island from human gut microbes, and enable  
384 further mechanistic interrogation of colibactin-induced DNA DSBs and  
385 colibactin-related CRC incidence and prevention.

386

387

388

389

390

391

392

393

394

395

396

397

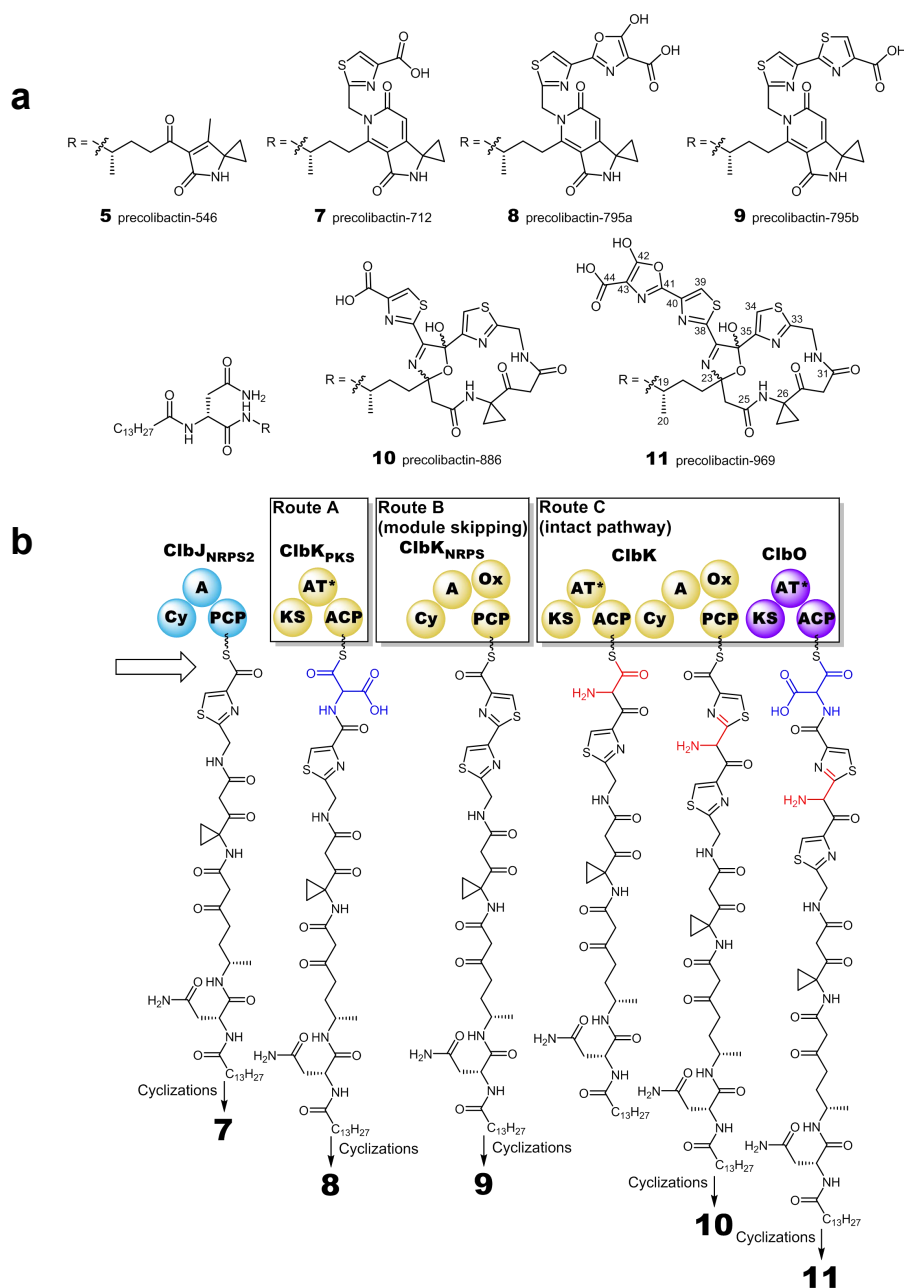

398

399 **Fig. 1 | Structures and proposed biosynthesis of precolibactins.** a, Structures of  
 400 precolibactin-546 (5), precolibactin-712 (7), precolibactin-795a (8),  
 401 precolibactin-795b (9), precolibactin-886 (10) and precolibactin-969 (11). b, Proposed  
 402 biosynthetic pathway of precolibactins. Extending from ClbJ, the dimodule  
 403 PKS/NRPS ClbK shows diverse functions in the production of *clb* metabolites. The  
 404 *clb* pathway utilizes only ClbK<sub>PKS</sub> to produce 8 (Route A); or skips ClbK<sub>PKS</sub> but  
 405 utilizes ClbK<sub>NRPS</sub> to produce 9 (Route B); or utilizes both of these two modules to  
 406 produce 10 which is the precursor for the assembly of 11 (Route C). A, adenylation;  
 407 ACP, acyl carrier protein; AT, acyltransferase; Cy, cyclization; KS, ketosynthase; Ox,  
 408 oxidase; PCP, peptidyl carrier protein. AT\* domains are predicted based on structural  
 409 topology as ancestral inactive relics.

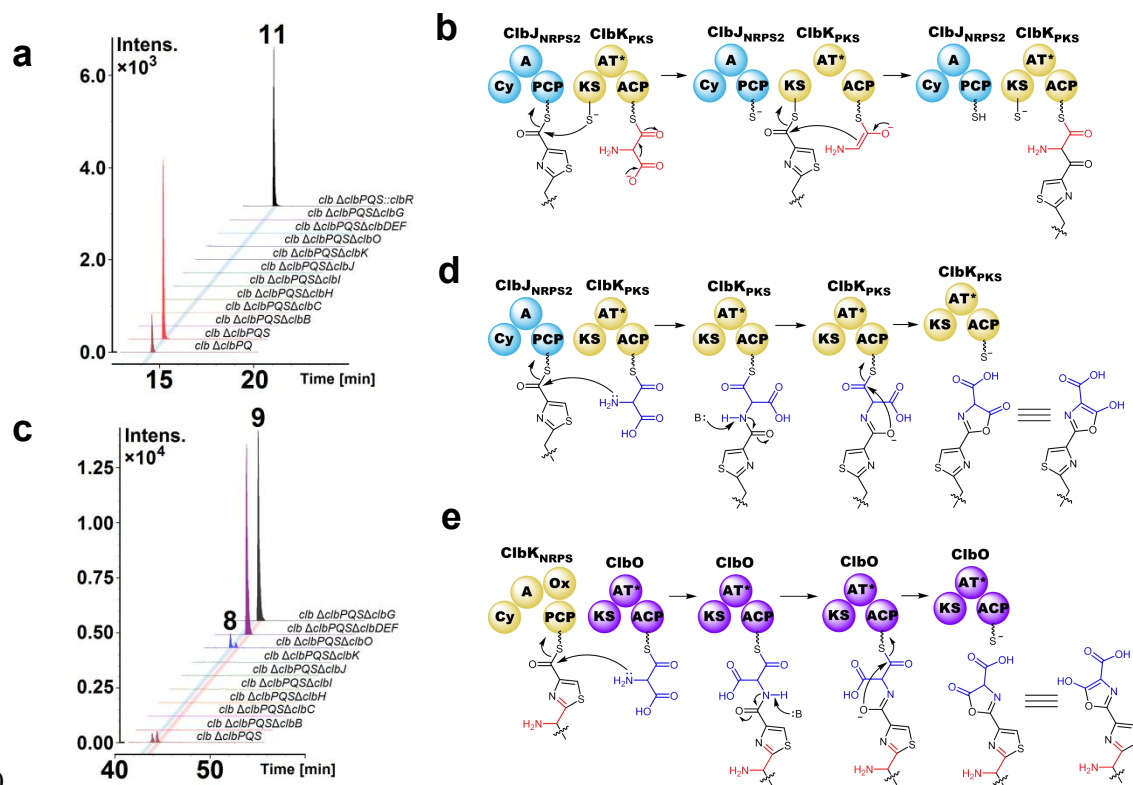

410

411

412 **Fig. 2 | Genes and proposed mechanisms of aminomalonate-utilizing PKSs in the**  
 413 **biosynthesis of precolibactins.** **a**, A comparison of LC–MS extracted ion  
 414 chromatogram traces of the metabolic extracts from  $\Delta$ *clbP* $\Delta$ *clbQ*,  $\Delta$ *clbP* $\Delta$ *clbQ* $\Delta$ *clbS*  
 415 and its nine mutants, and  $\Delta$ *clbP* $\Delta$ *clbQ* $\Delta$ *clbS::clbR*, showing the impact of gene  
 416 knockout or knockin on the yield of **11**, and the requirement of *clb* pathway genes for  
 417 the biosynthesis of **11**. EIC+ =  $970.38 \pm 0.01$ , which corresponds to **11**. **b**, Proposed  
 418 mechanism of *ClbK*<sub>PKS} underlying the production of **10**. The chain elongation is  
 419 achieved through C–C bond formation by decarboxylative Claisen condensation. **c**, A  
 420 comparison of LC–MS extracted ion chromatogram traces of the metabolic extracts  
 421 from *clbP* $\Delta$ *clbQ* $\Delta$ *clbS* and its nine mutants. EIC+ =  $796.37 \pm 0.01$  and  $796.35 \pm 0.01$ ,  
 422 which correspond to **8** and **9**, respectively. **d**, Proposed mechanism of *ClbK*<sub>PKS} under  
 423 lying the production of **8**. The chain elongation is achieved through C–N bond  
 424 formation by nucleophilic attack of the amine in the aminomalonate extender unit,  
 425 followed by synchronous cyclization and release of **8**. **e**, Proposed mechanism of  
 426 *ClbO* underlying the production of **11** with a similar biosynthetic logic to that of **8**. **b**,  
 427 **d** and **e**, A, adenylation; ACP, acyl carrier protein; AT, acyltransferase; Cy, cyclization;  
 428 KS, ketosynthase; Ox, oxidase; PCP, peptidyl carrier protein. AT\* domains are  
 429 predicted based on structural topology as ancestral inactive relics.</sub></sub>

430

431

432

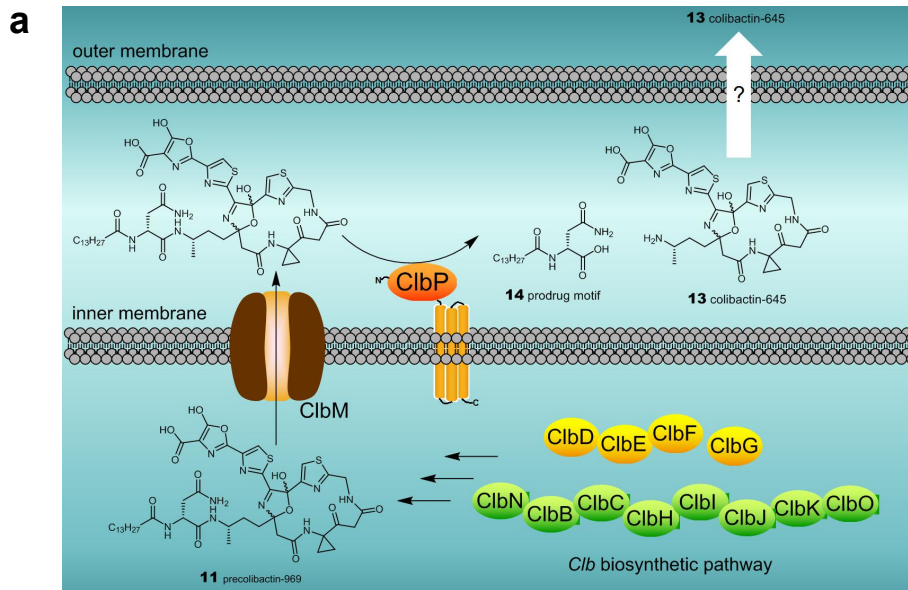

433

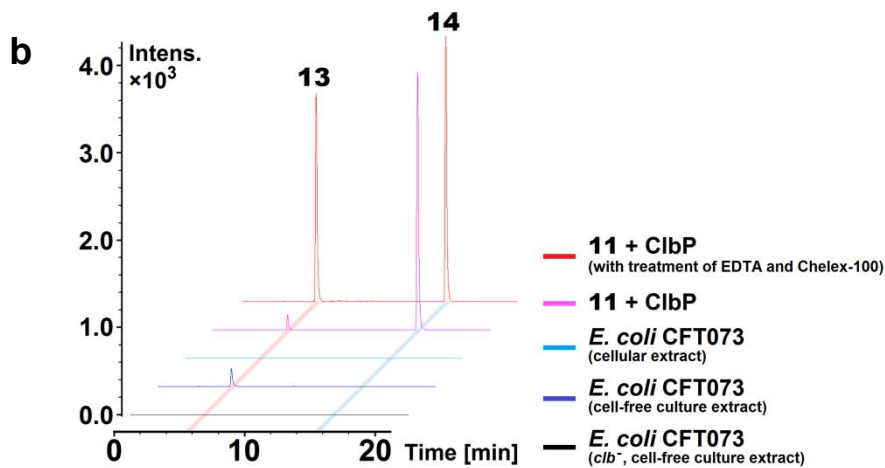

434

435

436 **Fig. 3 | Maturation of colibactin.** **a**, Proposed pathway for colibactin maturation. A  
 437 prodrug mechanism is involved in colibactin biosynthesis. Precolibactin-969 (**11**) is  
 438 biosynthesized in the cytoplasm of *E. coli* strains by the *clb* biosynthetic pathway and  
 439 transported via ClbM into the periplasm, whereby the membrane-bound peptidase,  
 440 ClbP, cleaves **11** to generate mature colibactin-645 (**13**) and a prodrug motif  
 441 *N*-myristoyl-D-asparagine (**14**), followed by outer membrane translocation. **b**, A  
 442 comparison of LC-MS extracted ion chromatogram traces shows the production of **13**  
 443 resulting from its precursor **11** cleavage by *E. coli* strains expressing the peptidase  
 444 gene *clbP* in the presence or absence of metal chelators; and the detection of  
 445 metabolite identical to **13** from either cell-free culture extracts or cellular extracts of  
 446 cultured wild-type *clb*<sup>+</sup> *E. coli* CFT073 and its *clb*<sup>-</sup> mutant. EIC<sup>+</sup> =  $646.14 \pm 0.01$  and  
 447  $343.26 \pm 0.01$ , which correspond to **13** and **14**, respectively.

448

449



450

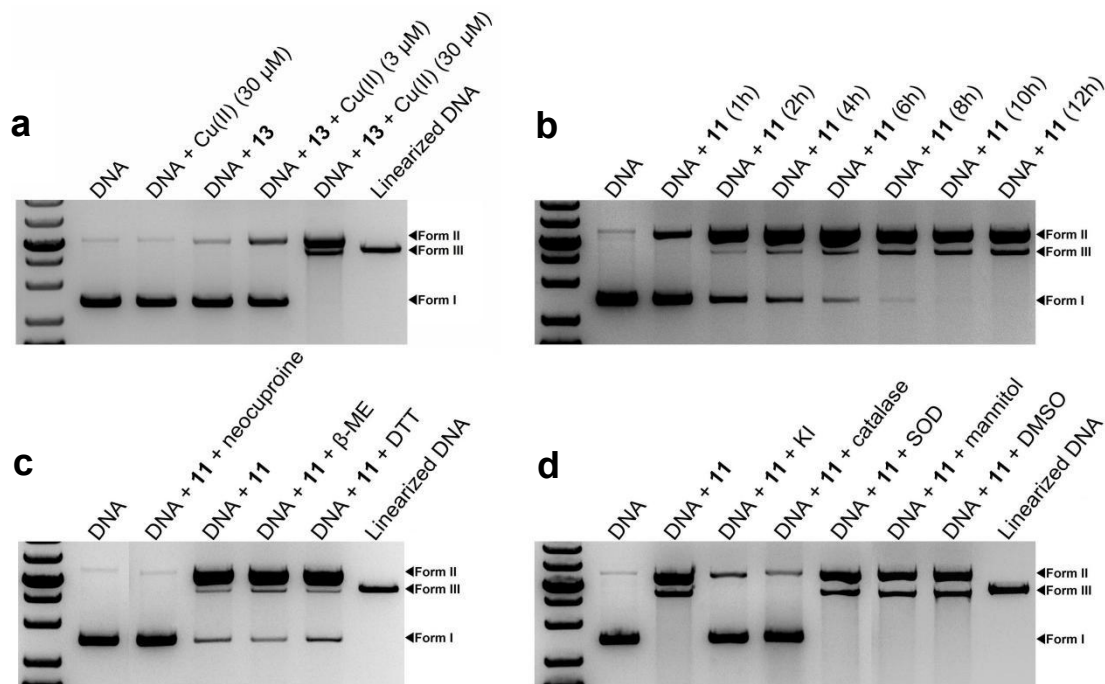

451

452

453 **Fig. 4 | Analysis of DNA damage by colibactin *in vitro*.** **a**, The effect of  
454 colibactin-645 (**13**) on the plasmid pBR322 DNA cleavage. Reactions were performed  
455 at 15 μM **13** in the absence or presence of Cu(II) (3 μM or 30 μM) for 12 hours at  
456 37 °C. DNA cleavage by **13** is observed only in the co-incubation of Cu(II) and **13**, in  
457 which nicked (Form II) and linearized (Form III) DNA forms from the supercoiled  
458 plasmid DNA (Form I). **b**, The time-dependent DNA damage induced by  
459 precolibactin-969 (**11**) (15 μM) is observed in the presence of Cu(II) (30 μM).  
460 Reactions were performed at 37 °C with different incubation times. **c**, The effect of a  
461 specific Cu(I) chelator neocuproine (1 mM), a reductant β-mercaptoethanol (β-ME) (5  
462 mM), or a reductant dithiothreitol (DTT) (5 mM) on the DNA cleavage by **11** (15 μM)  
463 in the presence of Cu(II) (30 μM). Reactions were performed at 37 °C for 4 h. **d**, The  
464 effect of various reactive oxygen species (ROS) scavengers, including potassium  
465 iodide (KI) (1 mM), catalase (0.1 mg/mL), superoxide dismutase (SOD) (10 units),  
466 mannitol (50 mM), and dimethyl sulfoxide (DMSO) (10%), on the **11**-induced DNA  
467 cleavage in the presence of Cu(II) (30 μM). Reactions were performed at 15 μM **11**,  
468 37 °C for 12 h. **b**, **c** and **d**, All of the controls (reactions without **11**) of each reagent or  
469 scavenger show no DNA cleavage similar to the negative control presented in the  
470 figure (the lane with DNA only). **a–d**, Top band, nicked DNA (Form II); middle band,  
471 linearized DNA (Form III); bottom band, supercoiled DNA (Form I).  
472 *EcoRI*-linearized pBR322 DNA is shown as the linearized DNA standard.

473

474

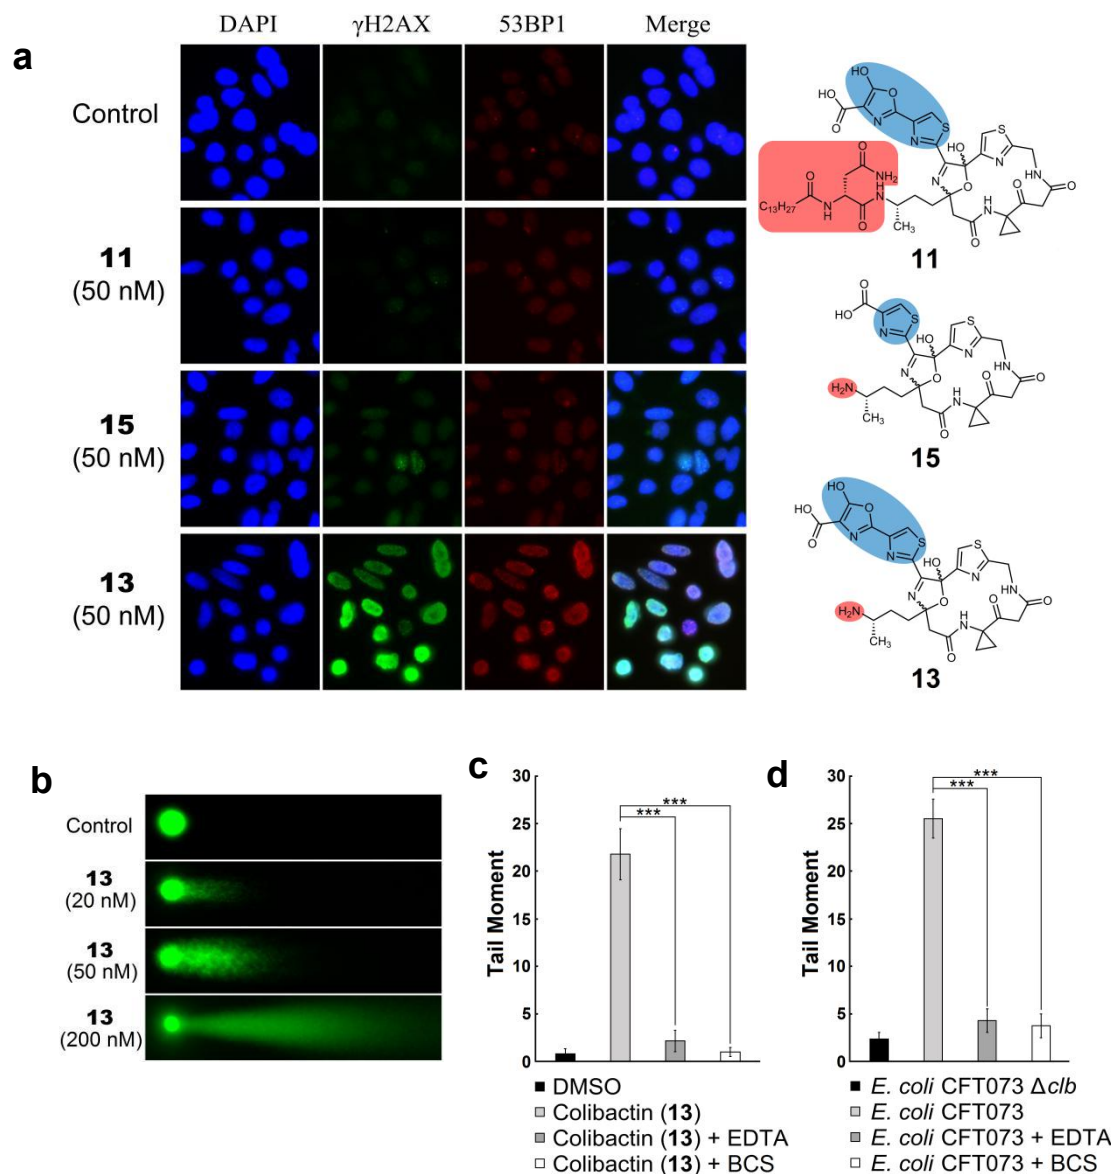

475  
476  
477

478  
479

480 **Fig. 5 | Colibactin-induced DNA damage in cell cultures.** **a**, Immunofluorescence  
481 imaging of  $\gamma$ H2AX and 53BP1 foci in HeLa cells that are treated with  
482 precolibactin-969 (**11**, 50 nM), colibactin-645 (**13**, 50 nM) or **15** (50 nM). Columns  
483 from left to right, nucleus (blue),  $\gamma$ H2AX (green), 53BP1 (red), and merge. In control,  
484 only DMSO solvent was added. **b**, Accrued DNA lesions are induced by increased  
485 concentrations of **13**, as measured by the neutral comet unwinding assay. **c**, The effect  
486 of either ethylenediaminetetraacetic acid (EDTA) (2.5 mM) or  
487 bathocuproinedisulfonic acid (BCS) (2 mM) on the DNA damage in HeLa cells after  
488 incubation with **13** (50 nM), as measured by the neutral comet assay. **d**, The effect of  
489 EDTA (2.5 mM) or BCS (2 mM) on the DNA damage in HeLa cells after incubation  
490 with the wild-type *clb*<sup>+</sup> *E. coli* CFT073, as measured by the neutral comet assay. **c**, **d**,  
491 Tail moment was obtained in the neutral comet unwinding assay, which represents the  
492 extent of DNA cleavage and is defined as the product of the tail length and the  
493 fraction of DNA in the tail. Bars represent mean tail moment (50 cells were randomly  
494 selected), error bars represent s.e.m.. \*\*\* $P < 0.001$  (one-way ANOVA).

495 **References**

- 496 1. Nicholson, J. K. et al. Host-gut microbiota metabolic interactions. *Science* **336**,  
497 1262–1267 (2012).
- 498 2. Cho, I. & Blaser, M. J. The human microbiome: at the interface of health and  
499 disease. *Nat. Rev. Genet.* **13**, 260–270 (2012).
- 500 3. Sharon, G. et al. Specialized metabolites from the microbiome in health and  
501 disease. *Cell Metab.* **20**, 719–730 (2014).
- 502 4. Donia, M. S. et al. A systematic analysis of biosynthetic gene clusters in the human  
503 microbiome reveals a common family of antibiotics. *Cell* **158**, 1402–1414 (2014).
- 504 5. Donia, M. S. & Fischbach, M. A. Small molecules from the human microbiota.  
505 *Science* **349**, 1254766 (2015).
- 506 6. Bode, H. B. The microbes inside us and the race for colibactin. *Angew. Chem. Int.*  
507 *Ed. Engl.* **54**, 10408–10411 (2015).
- 508 7. Balskus, E. P. Colibactin: understanding an elusive gut bacterial genotoxin. *Nat.*  
509 *Prod. Rep.* **32**, 1534–1540 (2015).
- 510 8. Faïs, T., Delmas, J., Barnich, N., Bonnet, R. & Dalmasso, G. Colibactin: more than  
511 a new bacterial toxin. *Toxins* **10**, e151 (2018).
- 512 9. Nougayrède, J. P. et al. *Escherichia coli* induces DNA double-strand breaks in  
513 eukaryotic cells. *Science* **313**, 848–851 (2006).
- 514 10. Cuevas-Ramos, G. et al. *Escherichia coli* induces DNA damage in vivo and  
515 triggers genomic instability in mammalian cells. *Proc. Natl. Acad. Sci. U.S.A.* **107**,  
516 11537–11542 (2010).
- 517 11. Secher, T., Samba-Louaka, A., Oswald, E. & Nougayrède, J. P. *Escherichia coli*  
518 producing colibactin triggers premature and transmissible senescence in mammalian  
519 cells. *PLOS ONE* **8**, e77157 (2013).
- 520 12. Cougnoux, A. et al. Bacterial genotoxin colibactin promotes colon tumour growth  
521 by inducing a senescence-associated secretory phenotype. *Gut* **63**, 1932–1942 (2014).
- 522 13. Payros, D. et al. Maternally acquired genotoxic *Escherichia coli* alters offspring's  
523 intestinal homeostasis. *Gut Microb.* **5**, 313–325 (2014).
- 524 14. Arthur, J. C. et al. Intestinal inflammation targets cancer-inducing activity of the  
525 microbiota. *Science* **338**, 120–123 (2012).
- 526 15. Tomkovich, S. et al. Locoregional effects of microbiota in a preclinical model of  
527 colon carcinogenesis. *Cancer Res.* **77**, 2620–2632 (2017).
- 528 16. Buc, E. et al. High prevalence of mucosa-associated *E. coli* producing  
529 cyclomodulin and genotoxin in colon cancer. *PLOS ONE* **8**, e56964 (2013).
- 530 17. Bondarev, V. et al. The genus *Pseudovibrio* contains metabolically versatile  
531 bacteria adapted for symbiosis. *Environ. Microbiol.* **15**, 2095–2113 (2013).
- 532 18. Engel, P., Vizcaino, M. I. & Crawford, J. M. Gut symbionts from distinct hosts  
533 exhibit genotoxic activity via divergent colibactin biosynthesis pathways. *Appl.*  
534 *Environ. Microbiol.* **81**, 1502–1512 (2015).

- 535 19. Brotherton, C. A. & Balskus, E. P. A prodrug resistance mechanism is involved in  
536 colibactin biosynthesis and cytotoxicity. *J. Am. Chem. Soc.* **135**, 3359–3362 (2013).
- 537 20. Bian, X. In vivo evidence for a prodrug activation mechanism during colibactin  
538 maturation. *ChemBioChem* **14**, 1194–1197 (2013).
- 539 21. Vizcaino, M. I., Engel, P., Trautman, E. & Crawford, J. M. Comparative  
540 metabolomics and structural characterizations illuminate colibactin  
541 pathway-dependent small molecules. *J. Am. Chem. Soc.* **136**, 9244–9247 (2014).
- 542 22. Brotherton, C. A., Wilson, M., Byrd, G. & Balskus, E. P. Isolation of a metabolite  
543 from the *pks* island provides insights into colibactin biosynthesis and activity. *Org.*  
544 *Lett.* **17**, 1545–1548 (2015).
- 545 23. Bian, X., Plaza, A., Zhang, Y. & Müller, R. Two more pieces of the colibactin  
546 genotoxin puzzle from *Escherichia coli* show incorporation of an unusual  
547 1-aminocyclopropanecarboxylic acid moiety. *Chem. Sci.* **6**, 3154–3160 (2015).
- 548 24. Vizcaino, M. I. & Crawford, J. M. The colibactin warhead crosslinks DNA. *Nat.*  
549 *Chem.* **7**, 411–417 (2015).
- 550 25. Li, Z.-R. et al. Critical intermediates reveal new biosynthetic events in the  
551 enigmatic colibactin pathway. *ChemBioChem* **16**, 1715–1719 (2015).
- 552 26. Brachmann, A. O. et al. Colibactin biosynthesis and biological activity depends  
553 on the rare aminomalonyl polyketide precursor. *Chem. Commun.* **51**, 13138–13141  
554 (2015).
- 555 27. Zha, L., Wilson, M. R., Brotherton, C. A. & Balskus, E. P. Characterization of  
556 polyketide synthase machinery from the *pks* island facilitates isolation of a candidate  
557 precolibactin. *ACS Chem. Biol.* **11**, 1287–1295 (2016).
- 558 28. Li, Z.-R. et al. Divergent biosynthesis yields a cytotoxic  
559 aminomalonnate-containing precolibactin. *Nat. Chem. Biol.* **12**, 773–775 (2016).
- 560 29. Zha, L. et al. Colibactin assembly line enzymes use *S*-adenosylmethionine to  
561 build a cyclopropane ring. *Nat. Chem. Biol.* **13**, 1063–1065 (2017).
- 562 30. Khanna, K. K. & Jackson S. P. DNA double-strand breaks: signaling, repair and  
563 the cancer connection. *Nat. Genet.* **27**, 247–254 (2001).
- 564 31. Guntaka, N. S., Healy, A. R., Crawford, J. M., Herzon, S. B. & Bruner, S. D.  
565 Structure and functional analysis of ClbQ, an unusual intermediate-releasing  
566 thioesterase from the colibactin biosynthetic pathway. *ACS Chem. Biol.* **12**,  
567 2598–2608 (2017).
- 568 32. Bossuet-Greif, N. et al. *Escherichia coli* ClbS is a colibactin resistance protein.  
569 *Mol. Microbiol.* **99**, 897–908 (2016).
- 570 33. Tripathi, P. et al. ClbS is a cyclopropane hydrolase that confers colibactin  
571 resistance. *J. Am. Chem. Soc.* **139**, 17719–17722 (2017).
- 572 34. Colis, L. C. et al. The cytotoxicity of (–)-lomaiviticin A arises from induction of  
573 double-strand breaks in DNA. *Nat. Chem.* **6**, 504–510 (2014).
- 574 35. Melvin, M. S. et al. Double-strand DNA cleavage by copper prodigiosin. *J. Am.*  
575 *Chem. Soc.* **122**, 6333–6334 (2000).

- 576 36. Povirk, L. F., Wübker, W., Köhnlein, W. & Hutchinson, F. DNA double-strand  
577 breaks and alkali-labile bonds produced by bleomycin *Nucleic Acids Res.* **4**,  
578 3573–3580 (1977).
- 579 37. Stubbe, J. A. & Kozarich, J. W. Mechanisms of bleomycin-induced DNA  
580 degradation. *Chem. Rev.* **87**, 1107–1136 (1987).
- 581 38. Chen, J. & Stubbe, J. Bleomycins: towards better therapeutics. *Nat. Rev. Cancer*  
582 **5**, 102–112 (2005).
- 583 39. Pitié, M. & Pratviel, G. Activation of DNA carbon-hydrogen bonds by metal  
584 complexes. *Chem. Rev.* **110**, 1018–1059 (2010).
- 585 40. Chaturvedi, K. S., Hung, C. S., Crowley, J. R., Stapleton, A. E. & Henderson, J. P.  
586 The siderophore yersiniabactin binds copper to protect pathogens during infection.  
587 *Nat. Chem. Biol.* **8**, 731–736 (2012).
- 588 41. Humphreys, K. J., Johnson, A. E., Karlin, K. D. & Rokita, S. E. Oxidative strand  
589 scission of nucleic acids by a multinuclear copper(II) complex. *J. Biol. Inorg. Chem.* **7**,  
590 835–842 (2002).
- 591 42. Rogakou, E. P., Pilch, D. R., Orr, A. H. Ivanova, V. S. & Bonner, W. M. DNA  
592 double-stranded breaks induce histone H2AX phosphorylation on serine **139**. *J. Biol.*  
593 *Chem.* **273**, 5858–5868 (1998).
- 594 43. Schultz, L. B., Chehab, N. H., Malikzay, A. & Halazonetis, T. D. p53 binding  
595 protein 1 (53bp1) is an early participant in the cellular response to DNA double-strand  
596 breaks. *J. Cell Biol.* **151**, 1381–1390 (2000).
- 597 44. Collins, A. The comet assay for DNA damage and repair. *Mol. Biotechnol.* **26**,  
598 249–261 (2004).
- 599 45. Burger, R. M., Peisach, J. & Horwitz, S. B. Activated bleomycin: a transient  
600 complex of drug, iron, and oxygen that degrades DNA. *J. Biol. Chem.* **256**,  
601 11636–11644 (1981).
- 602 46. Chan, Y. A. et al. Hydroxymalonyl-acyl carrier protein (ACP) and  
603 aminomalonyl-ACP are two additional type I polyketide synthase extender units. *Proc.*  
604 *Natl. Acad. Sci. USA* **103**, 14349–14354 (2006).
- 605 47. Holmes, T. C. et al. Molecular insights into the biosynthesis of guadinomine: a  
606 type III secretion system inhibitor. *J. Am. Chem. Soc.* **134**, 17797–17806 (2012).
- 607 48. Stern, B. R. et al. Copper and human health: biochemistry, genetics, and  
608 strategies for modeling dose-response relationships. *J. Toxicol. Env. Heal. B* **10**,  
609 157–222 (2007).
- 610 49. Pommier, Y. Drugging topoisomerases: lessons and challenges. *ACS Chem. Biol.*  
611 **8**, 82–95 (2013).
- 612 50. Woo, C. M., Li, Z., Paulson, E. K. & Herzon, S. B. Structural basis for DNA  
613 cleavage by the potent antiproliferative agent (–)-lomaiviticin A. *Proc. Natl. Acad. Sci.*  
614 *USA* **113**, 2851–2856 (2016).
